# Supplementary material for: Potent and selective covalent inhibition of the papain-like protease from SARS-CoV-2
Source: Nat Commun. 2023 Mar 28;14:1733. doi: 10.1038/s41467-023-37254-w (PMC10044120; doi:10.1038/s41467-023-37254-w)
Supplement: Supplementary file 4 — Supplementary Data 1 [file 41467_2023_37254_MOESM4_ESM.xlsx]

## Sheet: covalent
mol name	SMILES (covalent adduct)	top score (kcal/mol)	top score (GRL-like)	delta E (GRL-like - top score)	RMSD (Å)
ornl_H_L1_acryl_3_anti1	[H][C@@](C#N)(C(N)=O)[C@@]([H])(SCCC)C(=O)NNC(=O)CCc1ccccc1C(=O)N[C@H](C)c2cccc3ccccc23	-11.687	-11.687	0	1
ornl_H_L1_acryl_3_anti2	[H][C@](C#N)(C(N)=O)[C@]([H])(SCCC)C(=O)NNC(=O)CCc1ccccc1C(=O)N[C@H](C)c2cccc3ccccc23	-10.835	-10.14	0.7	1.4
ornl_H_L1_acryl_3_syn1	[H][C@@](C#N)(C(N)=O)[C@]([H])(SCCC)C(=O)NNC(=O)CCc1ccccc1C(=O)N[C@H](C)c2cccc3ccccc23	-10.381	-10.319	0.1	1
ornl_H_L1_acryl_3_syn2	[H][C@](C#N)(C(N)=O)[C@@]([H])(SCCC)C(=O)NNC(=O)CCc1ccccc1C(=O)N[C@H](C)c2cccc3ccccc23	-10.943	-10.864	0.1	1.6
ornl_H_L1_acryl_4_anti1	[H][C@](C#N)(c1nc(C)cs1)[C@]([H])(SCCC)C(=O)NNC(=O)CCc2ccccc2C(=O)N[C@H](C)c3cccc4ccccc34	-12.26	-12.26	0	0.8
ornl_H_L1_acryl_4_anti2	[H][C@@](C#N)(c1nc(C)cs1)[C@@]([H])(SCCC)C(=O)NNC(=O)CCc2ccccc2C(=O)N[C@H](C)c3cccc4ccccc34	-7.988	n/a	n/a	17.3
ornl_H_L1_acryl_4_syn1	[H][C@](C#N)(c1nc(C)cs1)[C@@]([H])(SCCC)C(=O)NNC(=O)CCc2ccccc2C(=O)N[C@H](C)c3cccc4ccccc34	-13.045	-13.045	0	0.9
ornl_H_L1_acryl_4_syn2	[H][C@@](C#N)(c1nc(C)cs1)[C@]([H])(SCCC)C(=O)NNC(=O)CCc2ccccc2C(=O)N[C@H](C)c3cccc4ccccc34	-11.825	-11.825	0	0.9
ornl_H_L1_acryl_5_anti1	[H][C@@](C#N)(c1ccc(C#N)cc1)[C@@]([H])(SCCC)C(=O)NNC(=O)CCc2ccccc2C(=O)N[C@H](C)c3cccc4ccccc34	-9.481	n/a	n/a	17.1
ornl_H_L1_acryl_5_anti2	[H][C@](C#N)(c1ccc(C#N)cc1)[C@]([H])(SCCC)C(=O)NNC(=O)CCc2ccccc2C(=O)N[C@H](C)c3cccc4ccccc34	-8.353	n/a	n/a	18
ornl_H_L1_acryl_5_syn1	[H][C@@](C#N)(c1ccc(C#N)cc1)[C@]([H])(SCCC)C(=O)NNC(=O)CCc2ccccc2C(=O)N[C@H](C)c3cccc4ccccc34	-9.726	-9.721	0	0.9
ornl_H_L1_acryl_5_syn2	[H][C@](C#N)(c1ccc(C#N)cc1)[C@@]([H])(SCCC)C(=O)NNC(=O)CCc2ccccc2C(=O)N[C@H](C)c3cccc4ccccc34	-11.307	-11.307	0	1
ornl_H_L1_acryl_6_anti1	[H][C@@](C#N)(c1ccncc1)[C@@]([H])(SCCC)C(=O)NNC(=O)CCc2ccccc2C(=O)N[C@H](C)c3cccc4ccccc34	-7.437	n/a	n/a	17.1
ornl_H_L1_acryl_6_anti2	[H][C@](C#N)(c1ccncc1)[C@]([H])(SCCC)C(=O)NNC(=O)CCc2ccccc2C(=O)N[C@H](C)c3cccc4ccccc34	-8.04	-6.576	1.5	1.5
ornl_H_L1_acryl_6_syn1	[H][C@@](C#N)(c1ccncc1)[C@]([H])(SCCC)C(=O)NNC(=O)CCc2ccccc2C(=O)N[C@H](C)c3cccc4ccccc34	-9.671	-9.671	0	0.9
ornl_H_L1_acryl_6_syn2	[H][C@](C#N)(c1ccncc1)[C@@]([H])(SCCC)C(=O)NNC(=O)CCc2ccccc2C(=O)N[C@H](C)c3cccc4ccccc34	-5.785	n/a	n/a	13.8
ornl_H_L1_acryl_7_anti1	[H][C@@](C#N)(c1cccnc1)[C@@]([H])(SCCC)C(=O)NNC(=O)CCc2ccccc2C(=O)N[C@H](C)c3cccc4ccccc34	-6.982	n/a	n/a	15.2
ornl_H_L1_acryl_7_anti2	[H][C@](C#N)(c1cccnc1)[C@]([H])(SCCC)C(=O)NNC(=O)CCc2ccccc2C(=O)N[C@H](C)c3cccc4ccccc34	-10.47	-10.012	0.5	1.2
ornl_H_L1_acryl_7_syn1	[H][C@@](C#N)(c1cccnc1)[C@]([H])(SCCC)C(=O)NNC(=O)CCc2ccccc2C(=O)N[C@H](C)c3cccc4ccccc34	-9.464	-8.443	1	0.7
ornl_H_L1_acryl_7_syn2	[H][C@](C#N)(c1cccnc1)[C@@]([H])(SCCC)C(=O)NNC(=O)CCc2ccccc2C(=O)N[C@H](C)c3cccc4ccccc34	-8.068	-6.931	1.1	1.5
ornl_H_L1_acryl_8_anti1	[H][C@@](C#N)(n1cncn1)[C@@]([H])(SCCC)C(=O)NNC(=O)CCc2ccccc2C(=O)N[C@H](C)c3cccc4ccccc34	-7.153	n/a	n/a	17.7
ornl_H_L1_acryl_8_anti2	[H][C@](C#N)(n1cncn1)[C@]([H])(SCCC)C(=O)NNC(=O)CCc2ccccc2C(=O)N[C@H](C)c3cccc4ccccc34	-12.513	-12.513	0	0.7
ornl_H_L1_acryl_8_syn1	[H][C@@](C#N)(n1cncn1)[C@]([H])(SCCC)C(=O)NNC(=O)CCc2ccccc2C(=O)N[C@H](C)c3cccc4ccccc34	-10.242	n/a	n/a	16.2
ornl_H_L1_acryl_8_syn2	[H][C@](C#N)(n1cncn1)[C@@]([H])(SCCC)C(=O)NNC(=O)CCc2ccccc2C(=O)N[C@H](C)c3cccc4ccccc34	-10.626	-10.626	0	0.9
ornl_H_L1_acryl_9_anti1	[H][C@@](C#N)(n1cccn1)[C@@]([H])(SCCC)C(=O)NNC(=O)CCc2ccccc2C(=O)N[C@H](C)c3cccc4ccccc34	-8.687	-8.687	0	1.2
ornl_H_L1_acryl_9_anti2	[H][C@](C#N)(n1cccn1)[C@]([H])(SCCC)C(=O)NNC(=O)CCc2ccccc2C(=O)N[C@H](C)c3cccc4ccccc34	-8.52	n/a	n/a	17.9
ornl_H_L1_acryl_9_syn1	[H][C@@](C#N)(n1cccn1)[C@]([H])(SCCC)C(=O)NNC(=O)CCc2ccccc2C(=O)N[C@H](C)c3cccc4ccccc34	-9.342	n/a	n/a	11.4
ornl_H_L1_acryl_9_syn2	[H][C@](C#N)(n1cccn1)[C@@]([H])(SCCC)C(=O)NNC(=O)CCc2ccccc2C(=O)N[C@H](C)c3cccc4ccccc34	-12.231	-12.231	0	1.4
ornl_H_L1_acryl_Ph_anti1	[H][C@@](C#N)(c1ccccc1)[C@@]([H])(SCCC)C(=O)NNC(=O)CCc2ccccc2C(=O)N[C@H](C)c3cccc4ccccc34	-7.347	n/a	n/a	18.4
ornl_H_L1_acryl_Ph_anti2	[H][C@](C#N)(c1ccccc1)[C@]([H])(SCCC)C(=O)NNC(=O)CCc2ccccc2C(=O)N[C@H](C)c3cccc4ccccc34	-12.933	-12.933	0	0.8
ornl_H_L1_acryl_Ph_syn1	[H][C@@](C#N)(c1ccccc1)[C@]([H])(SCCC)C(=O)NNC(=O)CCc2ccccc2C(=O)N[C@H](C)c3cccc4ccccc34	-8.218	n/a	n/a	15.7
ornl_H_L1_acryl_Ph_syn2	[H][C@](C#N)(c1ccccc1)[C@@]([H])(SCCC)C(=O)NNC(=O)CCc2ccccc2C(=O)N[C@H](C)c3cccc4ccccc34	-6.44	n/a	n/a	15.6
ornl_H_L2_acryl_Ph_anti1	[H][C@@](C#N)(c1ccccc1)[C@]([H])(NNC(=O)CCc2ccccc2C(=O)N[C@H](C)c3cccc4ccccc34)SCCC	-9.566	-9.566	0	1.7
ornl_H_L2_acryl_Ph_anti2	[H][C@](C#N)(c1ccccc1)[C@@]([H])(NNC(=O)CCc2ccccc2C(=O)N[C@H](C)c3cccc4ccccc34)SCCC	-10.632	-9.974	0.7	1.4
ornl_H_L2_acryl_Ph_syn1	[H][C@@](C#N)(c1ccccc1)[C@@]([H])(NNC(=O)CCc2ccccc2C(=O)N[C@H](C)c3cccc4ccccc34)SCCC	-10.232	n/a	n/a	17.2
ornl_H_L2_acryl_Ph_syn2	[H][C@](C#N)(c1ccccc1)[C@]([H])(NNC(=O)CCc2ccccc2C(=O)N[C@H](C)c3cccc4ccccc34)SCCC	-11.592	-11.592	0	1.4
ornl_H_L1_chl	CCCSCC(=O)NNC(=O)CCc1ccccc1C(=O)N[C@H](C)c2cccc3ccccc23	-11.763	-11.763	0	0.7
ornl_H_L1_prg1	CCCSC=CC(=O)NNC(=O)CCc1ccccc1C(=O)N[C@H](C)c2cccc3ccccc23	-12.082	-12.082	0	0.7
ornl_H_L1_prg2	C=C(CC(=O)NNC(=O)CCc1ccccc1C(=O)N[C@H](C)c2cccc3ccccc23)SCCC	-10.376	-10.376	0	0.9
ornl_NH2_L1_chl	CCCSCC(=O)NNC(=O)CCc1ccc(N)cc1C(=O)N[C@H](C)c2cccc3ccccc23	-12.227	-12.227	0	0.4
ornl_NH2_L1_prg1	CCCSC=CCC(=O)NNC(=O)CCc1ccc(N)cc1C(=O)N[C@H](C)c2cccc3ccccc23	-12.585	-12.585	0	0.8
ornl_NH2_L1_prg2	CCCSC=CCC(=O)NNC(=O)CCc1ccc(N)cc1C(=O)N[C@H](C)c2cccc3ccccc23	-12.715	-12.715	0	0.8
ornl_NHOAc_L1_chl	CCCSCC(=O)NNC(=O)CCc1ccc(NC(C)=O)cc1C(=O)N[C@H](C)c2cccc3ccccc23	-12.288	-12.288	0	1
ornl_NHOAc_L1_prg1	CCCSC=CC(=O)NNC(=O)CCc1ccc(NC(C)=O)cc1C(=O)N[C@H](C)c2cccc3ccccc23	-12.856	-12.856	0	0.8
ornl_NHOAc_L1_prg2	C=C(CC(=O)NNC(=O)CCc1ccc(NC(C)=O)cc1C(=O)N[C@H](C)c2cccc3ccccc23)SCCC	-11.158	-11.158	0	0.8
ornl_H_L1_imcl	CCCSCC=NNC(=O)CCc1ccccc1C(=O)N[C@H](C)c2cccc3ccccc23	-10.916	-10.916	0	0.6
ornl_H_L1_nitr1	CCCSC(=N)CC(=O)NNC(=O)CCc1ccccc1C(=O)N[C@H](C)c2cccc3ccccc23	-10.125	-10.125	0	1.5
ornl_NH2_L1_imcl	CCCSCC=NNC(=O)CCc1ccc(N)cc1C(=O)N[C@H](C)c2cccc3ccccc23	-12.04	-12.04	0	0.6
ornl_NH2_L1_nitr1	CCCSC(=N)CC(=O)NNC(=O)CCc1ccc(N)cc1C(=O)N[C@H](C)c2cccc3ccccc23	-10.403	-8.213	2.2	1.7
ornl_NHOAc_L1_imcl	CCCSCC=NNC(=O)CCc1ccc(NC(C)=O)cc1C(=O)N[C@H](C)c2cccc3ccccc23	-11.794	-11.794	0	1.1
ornl_NHOAc_L1_nitr1	CCCSC(=N)CC(=O)NNC(=O)CCc1ccc(NC(C)=O)cc1C(=O)N[C@H](C)c2cccc3ccccc23	-13.272	-13.15	0.1	0.8
ornl_H_L1_vme_a	[H][C@@](CC(=O)OC)(SCCC)C(=O)NNC(=O)CCc1ccccc1C(=O)N[C@H](C)c2cccc3ccccc23	-8.626	n/a	n/a	15.7
ornl_H_L1_vme_b	[H][C@](CC(=O)OC)(SCCC)C(=O)NNC(=O)CCc1ccccc1C(=O)N[C@H](C)c2cccc3ccccc23	-12.464	-12.464	0	0.8
ornl_NH2_L1_vme_a	[H][C@@](CC(=O)OC)(SCCC)C(=O)NNC(=O)CCc1ccc(N)cc1C(=O)N[C@H](C)c2cccc3ccccc23	-10.784	-10.784	0	1
ornl_NH2_L1_vme_b	[H][C@](CC(=O)OC)(SCCC)C(=O)NNC(=O)CCc1ccc(N)cc1C(=O)N[C@H](C)c2cccc3ccccc23	-7.764	n/a	n/a	17.3
ornl_NHOAc_L1_vme_a	[H][C@@](CC(=O)OC)(SCCC)C(=O)NNC(=O)CCc1ccc(NC(C)=O)cc1C(=O)N[C@H](C)c2cccc3ccccc23	-9.332	n/a	n/a	17
ornl_NHOAc_L1_vme_b	[H][C@](CC(=O)OC)(SCCC)C(=O)NNC(=O)CCc1ccc(NC(C)=O)cc1C(=O)N[C@H](C)c2cccc3ccccc23	-13.326	-13.326	0	1
ornl_H_L1_vme2_a	[H][C@](CNNC(=O)CCc1ccccc1C(=O)N[C@H](C)c2cccc3ccccc23)(CC(=O)OC)SCCC	-12.13	-12.13	0	0.7
ornl_H_L1_vme2_b	[H][C@@](CNNC(=O)CCc1ccccc1C(=O)N[C@H](C)c2cccc3ccccc23)(CC(=O)OC)SCCC	-10.937	-10.937	0	1.1
ornl_NH2_L1_vme2_a	[H][C@](CNNC(=O)CCc1ccc(N)cc1C(=O)N[C@H](C)c2cccc3ccccc23)(CC(=O)OC)SCCC	-8.744	n/a	n/a	2.2
ornl_NH2_L1_vme2_b	[H][C@@](CNNC(=O)CCc1ccc(N)cc1C(=O)N[C@H](C)c2cccc3ccccc23)(CC(=O)OC)SCCC	-8.727	n/a	n/a	12.5
ornl_NHOAc_L1_vme2_a	[H][C@](CNNC(=O)CCc1ccc(NC(C)=O)cc1C(=O)N[C@H](C)c2cccc3ccccc23)(CC(=O)OC)SCCC	-11.415	-11.415	0	0.7
ornl_NHOAc_L1_vme2_b	[H][C@@](CNNC(=O)CCc1ccc(NC(C)=O)cc1C(=O)N[C@H](C)c2cccc3ccccc23)(CC(=O)OC)SCCC	-10.301	-10.301	0	0.9
ornl_H_L1_vme3_a	[H][C@](CC(=O)NNC(=O)CCc1ccccc1C(=O)N[C@H](C)c2cccc3ccccc23)(CC(=O)OC)SCCC	-10.832	-10.832	0	0.8
ornl_H_L1_vme3_b	[H][C@@](CC(=O)NNC(=O)CCc1ccccc1C(=O)N[C@H](C)c2cccc3ccccc23)(CC(=O)OC)SCCC	-9.488	-9.488	0	1
ornl_NH2_L1_vme3_a	[H][C@](CC(=O)NNC(=O)CCc1ccc(N)cc1C(=O)N[C@H](C)c2cccc3ccccc23)(CC(=O)OC)SCCC	-10.73	-10.529	0.2	0.8
ornl_NH2_L1_vme3_b	[H][C@@](CC(=O)NNC(=O)CCc1ccc(N)cc1C(=O)N[C@H](C)c2cccc3ccccc23)(CC(=O)OC)SCCC	-11.024	n/a	n/a	2.2
ornl_NHOAc_L1_vme3_a	[H][C@](CC(=O)NNC(=O)CCc1ccc(NC(C)=O)cc1C(=O)N[C@H](C)c2cccc3ccccc23)(CC(=O)OC)SCCC	-11.298	-11.298	0	1.2
ornl_NHOAc_L1_vme3_b	[H][C@@](CC(=O)NNC(=O)CCc1ccc(NC(C)=O)cc1C(=O)N[C@H](C)c2cccc3ccccc23)(CC(=O)OC)SCCC	-10.889	n/a	n/a	2.2
ornl_H_L1_bcs_acryl_1_a	[H][C@@](C#N)(C(=O)NNC(=O)CCc1ccccc1C(=O)N[C@H](C)c2cccc3ccccc23)[C@]([H])(SCCC)C4CC4	-9.427	n/a	n/a	2.5
ornl_H_L1_bcs_acryl_1_b	[H][C@@](C#N)(C(=O)NNC(=O)CCc1ccccc1C(=O)N[C@H](C)c2cccc3ccccc23)[C@@]([H])(SCCC)C4CC4	-9.005	n/a	n/a	2.4
ornl_H_L1_bcs_acryl_1_c	[H][C@](C#N)(C(=O)NNC(=O)CCc1ccccc1C(=O)N[C@H](C)c2cccc3ccccc23)[C@@]([H])(SCCC)C4CC4	-8.615	n/a	n/a	12.3
ornl_H_L1_bcs_acryl_1_d	[H][C@](C#N)(C(=O)NNC(=O)CCc1ccccc1C(=O)N[C@H](C)c2cccc3ccccc23)[C@]([H])(SCCC)C4CC4	-8.42	-8.42	0	1.6
ornl_NH2_L1_bcs_acryl_1_a	[H][C@@](C#N)(C(=O)NNC(=O)CCc1ccc(N)cc1C(=O)N[C@H](C)c2cccc3ccccc23)[C@]([H])(SCCC)C4CC4	-8.076	n/a	n/a	12.7
ornl_NH2_L1_bcs_acryl_1_b	[H][C@@](C#N)(C(=O)NNC(=O)CCc1ccc(N)cc1C(=O)N[C@H](C)c2cccc3ccccc23)[C@@]([H])(SCCC)C4CC4	-8.104	n/a	n/a	14.6
ornl_NH2_L1_bcs_acryl_1_c	[H][C@](C#N)(C(=O)NNC(=O)CCc1ccc(N)cc1C(=O)N[C@H](C)c2cccc3ccccc23)[C@@]([H])(SCCC)C4CC4	-8.606	n/a	n/a	17.7
ornl_NH2_L1_bcs_acryl_1_d	[H][C@](C#N)(C(=O)NNC(=O)CCc1ccc(N)cc1C(=O)N[C@H](C)c2cccc3ccccc23)[C@]([H])(SCCC)C4CC4	-9.468	n/a	n/a	2.3
ornl_NHOAc_L1_bcs_acryl_1_a	[H][C@@](C#N)(C(=O)NNC(=O)CCc1ccc(NC(C)=O)cc1C(=O)N[C@H](C)c2cccc3ccccc23)[C@]([H])(SCCC)C4CC4	-11.699	-9.798	1.9	1.6
ornl_NHOAc_L1_bcs_acryl_1_b	[H][C@@](C#N)(C(=O)NNC(=O)CCc1ccc(NC(C)=O)cc1C(=O)N[C@H](C)c2cccc3ccccc23)[C@@]([H])(SCCC)C4CC4	-9.476	n/a	n/a	2.1
ornl_NHOAc_L1_bcs_acryl_1_c	[H][C@](C#N)(C(=O)NNC(=O)CCc1ccc(NC(C)=O)cc1C(=O)N[C@H](C)c2cccc3ccccc23)[C@@]([H])(SCCC)C4CC4	-8.48	n/a	n/a	15.2
ornl_NHOAc_L1_bcs_acryl_1_d	[H][C@](C#N)(C(=O)NNC(=O)CCc1ccc(NC(C)=O)cc1C(=O)N[C@H](C)c2cccc3ccccc23)[C@]([H])(SCCC)C4CC4	-8.123	n/a	n/a	18.3

## Sheet: noncovalent
mol name	SMILES	top score (kcal/mol)	top score (GRL-like)	delta E (GRL-like - top score)	RMSD (Å)
ornl_H_L1_acryl_3	C[C@@H](NC(=O)c1ccccc1CCC(=O)NNC(=O)C=C(C#N)C(N)=O)c2cccc3ccccc23	-13.289	-13.289	0	1.8
ornl_H_L1_acryl_4	Cc4csc(C(C#N)=CC(=O)NNC(=O)CCc1ccccc1C(=O)N[C@H](C)c2cccc3ccccc23)n4	-12.768	n/a	n/a	2.3
ornl_H_L1_acryl_5	C[C@@H](NC(=O)c1ccccc1CCC(=O)NNC(=O)C=C(C#N)c2ccc(C#N)cc2)c3cccc4ccccc34	-14.073	-14.073	0	0.8
ornl_H_L1_acryl_6	C[C@@H](NC(=O)c1ccccc1CCC(=O)NNC(=O)C=C(C#N)c2ccncc2)c3cccc4ccccc34	-13.987	-13.987	0	1.3
ornl_H_L1_acryl_7	C[C@@H](NC(=O)c1ccccc1CCC(=O)NNC(=O)C=C(C#N)c2cccnc2)c3cccc4ccccc34	-14.12	-14.12	0	0.9
ornl_H_L1_acryl_8	C[C@@H](NC(=O)c1ccccc1CCC(=O)NNC(=O)C=C(C#N)n2cncn2)c3cccc4ccccc34	-13.21	-13.21	0	0.9
ornl_H_L1_acryl_9	C[C@@H](NC(=O)c1ccccc1CCC(=O)NNC(=O)C=C(C#N)n2cccn2)c3cccc4ccccc34	-14.071	-14.071	0	1.1
ornl_H_L2_acryl_Ph	C[C@@H](NC(=O)c1ccccc1CCC(=O)NNC=C(C#N)c2ccccc2)c3cccc4ccccc34	-12.537	-12.537	0	1.4
ornl_NH2_L1_acryl_3	C[C@@H](NC(=O)c1cc(N)ccc1CCC(=O)NNC(=O)C=C(C#N)C(N)=O)c2cccc3ccccc23	-13.636	-13.636	0	0.9
ornl_NH2_L1_acryl_4	Cc4csc(C(C#N)=CC(=O)NNC(=O)CCc1ccc(N)cc1C(=O)N[C@H](C)c2cccc3ccccc23)n4	-12.538	n/a	n/a	7.1
ornl_NH2_L1_acryl_5	C[C@@H](NC(=O)c1cc(N)ccc1CCC(=O)NNC(=O)C=C(C#N)c2ccc(C#N)cc2)c3cccc4ccccc34	-13.866	-13.579	0.3	1
ornl_NH2_L1_acryl_6	C[C@@H](NC(=O)c1cc(N)ccc1CCC(=O)NNC(=O)C=C(C#N)c2ccncc2)c3cccc4ccccc34	-12.997	-12.997	0	1.3
ornl_NH2_L1_acryl_7	C[C@@H](NC(=O)c1cc(N)ccc1CCC(=O)NNC(=O)C=C(C#N)c2cccnc2)c3cccc4ccccc34	-13.889	-12.823	1.1	0.9
ornl_NH2_L1_acryl_8	C[C@@H](NC(=O)c1cc(N)ccc1CCC(=O)NNC(=O)C=C(C#N)n2cncn2)c3cccc4ccccc34	-14.299	-14.299	0	0.7
ornl_NH2_L1_acryl_9	C[C@@H](NC(=O)c1cc(N)ccc1CCC(=O)NNC(=O)C=C(C#N)n2cccn2)c3cccc4ccccc34	-13.726	-13.726	0	0.9
ornl_NH2_L2_acryl_Ph	C[C@@H](NC(=O)c1cc(N)ccc1CCC(=O)NNC=C(C#N)c2ccccc2)c3cccc4ccccc34	-13.803	-12.973	0.8	1.2
ornl_NHOAc_L1_acryl_3	CC(=O)Nc3ccc(CCC(=O)NNC(=O)C=C(C#N)C(N)=O)c(C(=O)N[C@H](C)c1cccc2ccccc12)c3	-15.279	-15.279	0	0.8
ornl_NHOAc_L1_acryl_4	CC(=O)Nc4ccc(CCC(=O)NNC(=O)C=C(C#N)c1nc(C)cs1)c(C(=O)N[C@H](C)c2cccc3ccccc23)c4	-13.696	n/a	n/a	4.1
ornl_NHOAc_L1_acryl_5	CC(=O)Nc4ccc(CCC(=O)NNC(=O)C=C(C#N)c1ccc(C#N)cc1)c(C(=O)N[C@H](C)c2cccc3ccccc23)c4	-13.549	-12.97	0.6	1.2
ornl_NHOAc_L1_acryl_6	CC(=O)Nc4ccc(CCC(=O)NNC(=O)C=C(C#N)c1ccncc1)c(C(=O)N[C@H](C)c2cccc3ccccc23)c4	-13.653	n/a	n/a	4.1
ornl_NHOAc_L1_acryl_7	CC(=O)Nc4ccc(CCC(=O)NNC(=O)C=C(C#N)c1cccnc1)c(C(=O)N[C@H](C)c2cccc3ccccc23)c4	-14.426	n/a	n/a	4.1
ornl_NHOAc_L1_acryl_8	CC(=O)Nc4ccc(CCC(=O)NNC(=O)C=C(C#N)n1cncn1)c(C(=O)N[C@H](C)c2cccc3ccccc23)c4	-14.011	-12.557	1.5	1.5
ornl_NHOAc_L1_acryl_9	CC(=O)Nc4ccc(CCC(=O)NNC(=O)C=C(C#N)n1cccn1)c(C(=O)N[C@H](C)c2cccc3ccccc23)c4	-13.862	n/a	n/a	4
ornl_NHOAc_L2_acryl_Ph	CC(=O)Nc4ccc(CCC(=O)NNC=C(C#N)c1ccccc1)c(C(=O)N[C@H](C)c2cccc3ccccc23)c4	-15.558	-15.558	0	0.8
ornl_H_L1_CH2OH	[H]N(C(=O)c1ccccc1CCC(=O)NNC(=O)CO)[C@]([H])(C)c2cccc3ccccc23	-12.649	-12.615	0	0.7
ornl_H_L1_hydrazide	[H]N(C(=O)c1ccccc1CCC(=O)NN)[C@]([H])(C)c2cccc3ccccc23	-12.03	-12.03	0	0.8
ornl_H_L1_OMe	[H]N(C(=O)c1ccccc1CCC(=O)OC)[C@]([H])(C)c2cccc3ccccc23	-11.782	-11.782	0	0.6
ornl_NH2_L1_CH2OH	[H]N(C(=O)c1cc(N)ccc1CCC(=O)NNC(=O)CO)[C@]([H])(C)c2cccc3ccccc23	-13.2	-13.2	0	0.9
ornl_NH2_L1_hydrazide	[H]N(C(=O)c1cc(N)ccc1CCC(=O)NN)[C@]([H])(C)c2cccc3ccccc23	-12.24	-11.843	0.4	1
ornl_NH2_L1_OMe	[H]N(C(=O)c1cc(N)ccc1CCC(=O)OC)[C@]([H])(C)c2cccc3ccccc23	-11.844	-11.843	0	0.9
ornl_NHOAc_L1_CH2OH	[H]N(C(=O)c1cc(NC(C)=O)ccc1CCC(=O)NNC(=O)CO)[C@]([H])(C)c2cccc3ccccc23	-14.009	-14.009	0	0.9
ornl_NHOAc_L1_hydrazide	[H]N(C(=O)c1cc(NC(C)=O)ccc1CCC(=O)NN)[C@]([H])(C)c2cccc3ccccc23	-13.174	-12.875	0.3	0.8
ornl_NHOAc_L1_OMe	[H]N(C(=O)c1cc(NC(C)=O)ccc1CCC(=O)OC)[C@]([H])(C)c2cccc3ccccc23	-12.72	-12.515	0.2	0.9
ornl_H_L1_chl	[H]N(C(=O)c1ccccc1CCC(=O)NNC(=O)CCl)[C@]([H])(C)c2cccc3ccccc23	-12.691	-12.691	0	1
ornl_H_L1_prg1	C#CC(=O)NNC(=O)CCc1ccccc1C(=O)N[C@H](C)c2cccc3ccccc23	-12.305	-12.305	0	1.1
ornl_H_L1_prg2	C#CCC(=O)NNC(=O)CCc1ccccc1C(=O)N[C@H](C)c2cccc3ccccc23	-12.784	n/a	n/a	2.3
ornl_NH2_L1_chl	C[C@H](c(ccc1)c2c1cccc2)NC(c3c(CCC(NNC(CCl)=O)=O)ccc(N)c3)=O	-10.994	-10.994	0	1.5
ornl_NH2_L1_prg1	C#CC(=O)NNC(=O)CCc1ccc(N)cc1C(=O)N[C@H](C)c2cccc3ccccc23	-12.679	-12.679	0	1
ornl_NH2_L1_prg2	C#CCC(=O)NNC(=O)CCc1ccc(N)cc1C(=O)N[C@H](C)c2cccc3ccccc23	-13.291	-13.291	0	1
ornl_NHOAc_L1_chl	[H]N(C(=O)c1cc(NC(C)=O)ccc1CCC(=O)NNC(=O)CCl)[C@]([H])(C)c2cccc3ccccc23	-13.122	-11.424	1.7	1.3
ornl_NHOAc_L1_prg1	C#CC(=O)NNC(=O)CCc1ccc(NC(C)=O)cc1C(=O)N[C@H](C)c2cccc3ccccc23	-13.506	-13.074	0.4	1.2
ornl_NHOAc_L1_prg2	C#CCC(=O)NNC(=O)CCc1ccc(NC(C)=O)cc1C(=O)N[C@H](C)c2cccc3ccccc23	-12.903	-11.96	0.9	0.9
grl0617	C[C@@H](NC(=O)c1cc(N)ccc1C)c2cccc3ccccc23	-10.949	-10.949	0	0.5
plp_snyder441	C[C@@H](NC(=O)c1cccc(N)c1C)c2cccc3ccccc23	-10.519	-10.519	0	1.5
plp_snyder495	C[C@@H](NC(=O)c1cc(NC(=O)NC(N)=O)ccc1C)c2cccc3ccccc23	-13.42	-11.283	2.1	0.6
plp_snyder530	C[C@@H](NC(=O)c1cc(NC(=O)C=C)ccc1C)c2cccc3ccccc23	-12.061	-11.422	0.6	2
ornl_H_L1_acryl_Ph	C[C@@H](NC(=O)c1ccccc1CCC(=O)NNC(=O)C=C(C#N)c2ccccc2)c3cccc4ccccc34	-14.24	-14.24	0	0.8
ornl_H_L1_imcl	C[C@@H](NC(=O)c1ccccc1CCC(=O)NN=CCCl)c2cccc3ccccc23	-12.941	-12.941	0	0.7
ornl_H_L1_nitr1	C[C@@H](NC(=O)c1ccccc1CCC(=O)NNC(=O)CC#N)c2cccc3ccccc23	-13.251	-13.251	0	0.7
ornl_NH2_L1_acryl_Ph	C[C@@H](NC(=O)c1cc(N)ccc1CCC(=O)NNC(=O)C=C(C#N)c2ccccc2)c3cccc4ccccc34	-13.8	-13.638	0.2	0.8
ornl_NH2_L1_imcl	C[C@@H](NC(=O)c1cc(N)ccc1CCC(=O)NN=CCCl)c2cccc3ccccc23	-13.021	-13.021	0	0.7
ornl_NH2_L1_nitr1	C[C@@H](NC(=O)c1cc(N)ccc1CCC(=O)NNC(=O)CC#N)c2cccc3ccccc23	-13.73	-13.73	0	0.8
ornl_NHOAc_L1_acryl_Ph	CC(=O)Nc4ccc(CCC(=O)NNC(=O)C=C(C#N)c1ccccc1)c(C(=O)N[C@H](C)c2cccc3ccccc23)c4	-15.177	-13.666	1.5	0.9
ornl_NHOAc_L1_imcl	CC(=O)Nc3ccc(CCC(=O)NN=CCCl)c(C(=O)N[C@H](C)c1cccc2ccccc12)c3	-12.712	-11.72	1	0.7
ornl_NHOAc_L1_nitr1	CC(=O)Nc3ccc(CCC(=O)NNC(=O)CC#N)c(C(=O)N[C@H](C)c1cccc2ccccc12)c3	-14.848	-14.848	0	0.7
ornl_H_L1_vme	COC(=O)C=CC(=O)NNC(=O)CCc1ccccc1C(=O)N[C@H](C)c2cccc3ccccc23	-12.785	-12.785	0	1.1
ornl_NH2_L1_vme	COC(=O)C=CC(=O)NNC(=O)CCc1ccc(N)cc1C(=O)N[C@H](C)c2cccc3ccccc23	-10.872	n/a	n/a	12.8
ornl_NHOAc_L1_vme	COC(=O)C=CC(=O)NNC(=O)CCc1ccc(NC(C)=O)cc1C(=O)N[C@H](C)c2cccc3ccccc23	-11.566	n/a	n/a	2.9
ornl_H_L1_vme2	COC(=O)C=CCNNC(=O)CCc1ccccc1C(=O)N[C@H](C)c2cccc3ccccc23	-12.703	-12.703	0	1
ornl_NH2_L1_vme2	COC(=O)C=CCNNC(=O)CCc1ccc(N)cc1C(=O)N[C@H](C)c2cccc3ccccc23	-11.682	n/a	n/a	2.4
ornl_NHOAc_L1_vme2	COC(=O)C=CCNNC(=O)CCc1ccc(NC(C)=O)cc1C(=O)N[C@H](C)c2cccc3ccccc23	-11.28	n/a	n/a	6.2
ornl_H_L1_vme3	COC(=O)CC=CC(=O)NNC(=O)CCc1ccccc1C(=O)N[C@H](C)c2cccc3ccccc23	-11.036	n/a	n/a	12.6
ornl_NH2_L1_vme3	COC(=O)CC=CC(=O)NNC(=O)CCc1ccc(N)cc1C(=O)N[C@H](C)c2cccc3ccccc23	-11.024	n/a	n/a	6.7
ornl_NHOAc_L1_vme3	COC(=O)CC=CC(=O)NNC(=O)CCc1ccc(NC(C)=O)cc1C(=O)N[C@H](C)c2cccc3ccccc23	-11.122	-9.475	1.6	1.4
grl0617_acetamide	CC(=O)Nc3ccc(C)c(C(=O)N[C@H](C)c1cccc2ccccc12)c3	-11.641	-10.807	0.8	0.9
grl0617_desamino	Cc1ccccc1C(=O)N[C@H](C)c2cccc3ccccc23	-10.122	-10.122	0	0.5
ornl_H_L1_bcs_acryl_1_a	C[C@H](c(ccc1)c2c1cccc2)NC(c3c(CCC(NNC(/C(C#N)=C/C4CC4)=O)=O)cccc3)=O	-13.248	-13.248	0	1.2
ornl_H_L1_bcs_acryl_1_b	C[C@H](c(ccc1)c2c1cccc2)NC(c3c(CCC(NNC(/C(C#N)=C\C4CC4)=O)=O)cccc3)=O	-12.447	-12.416	0	1.2

## Sheet: experimentally tested
compound num	alt name ncov	alt name(s) cov	SMILES
GRL0617	grl0617	N/A	C[C@@H](NC(=O)c1cc(N)ccc1C)c2cccc3ccccc23
3	ornl_H_L1_OMe	N/A	[H]N(C(=O)c1ccccc1CCC(=O)OC)[C@]([H])(C)c2cccc3ccccc23
5	ornl_H_L1_hydrazide	N/A	[H]N(C(=O)c1ccccc1CCC(=O)OC)[C@]([H])(C)c2cccc3ccccc23
7	ornl_H_L1_vme	ornl_H_L1_vme_a, ornl_H_L1_vme_b	COC(=O)C=CC(=O)NNC(=O)CCc1ccccc1C(=O)N[C@H](C)c2cccc3ccccc23
8	ornl_NHOAc_L1_vme	ornl_NHOAc_L1_vme	COC(=O)C=CC(=O)NNC(=O)CCc1ccc(NC(C)=O)cc1C(=O)N[C@H](C)c2cccc3ccccc23
9	ornl_H_L1_chl	ornl_H_L1_chl	[H]N(C(=O)c1ccccc1CCC(=O)NNC(=O)CCl)[C@]([H])(C)c2cccc3ccccc23
10	ornl_NHOAc_L1_chl	ornl_NHOAc_L1_chl	[H]N(C(=O)c1cc(NC(C)=O)ccc1CCC(=O)NNC(=O)CCl)[C@]([H])(C)c2cccc3ccccc23
11	ornl_H_L1_nitr1	ornl_H_L1_nitr1	C[C@@H](NC(=O)c1ccccc1CCC(=O)NNC(=O)CC#N)c2cccc3ccccc23
12	ornl_H_L1_prg1	ornl_H_L1_prg1	C#CCC(=O)NNC(=O)CCc1ccc(N)cc1C(=O)N[C@H](C)c2cccc3ccccc23
13	ornl_H_L1_bcs_acryl_1_a	ornl_H_L1_bcs_acryl_1_d	C[C@H](c(ccc1)c2c1cccc2)NC(c3c(CCC(NNC(/C(C#N)=C/C4CC4)=O)=O)cccc3)=O
14	grl0617_desamino	N/A	Cc1ccccc1C(=O)N[C@H](C)c2cccc3ccccc23
15	grl0617_acetamide	N/A	CC(=O)Nc3ccc(C)c(C(=O)N[C@H](C)c1cccc2ccccc12)c3
