# Supplementary material for: Potent and selective covalent inhibition of the papain-like protease from SARS-CoV-2
Source: Nat Commun. 2023 Mar 28;14:1733. doi: 10.1038/s41467-023-37254-w (PMC10044120; doi:10.1038/s41467-023-37254-w)
Supplement: Supplementary file 6 — Source Data [file 41467_2023_37254_MOESM6_ESM.xlsx]

## Sheet: Figure 5
Figure 5
5a	% Plpro activity				5b	Kobs (min^-1)
Concentration of inhibitor (uM)	compound 7				[compound 7], uM	mean
200	4.34741	2.67582			0.3	0.09135
63.29	4.29974	1.06143			0.25	0.09376
20.03	2.84743	1.7574			0.2	0.03867
6.34	-0.572028	4.26161			0.17	0.03194
2.01	-0.101694	1.95761			0.14	0.01526
0.63	0.448088	1.84956			0.1	0.004243
0.2	17.4055	17.3769
0.06	66.6095	84.4377
0.02	68.3065	93.4376
5c					5d	cytopathic effect				cytotoxicity
	PLpro wild type					% cell viability				% cell viability
	m/z	charge			[inhibitor], uM	compound 7			[inhibitor], uM	compound 7
	1044.83	35			33.3	79.7616	87.0127		33.3	84.8824	79.2702
	1075.51	34			16.65	88.8254	97.0077		16.65	95.686	90.3895
	1108.1	33			8.325	95.2833	73.4931		8.325	99.6095	99.5452
	1142.68	32			4.163	79.3228	69.2595		4.163	97.1417	99.5474
	1179.52	31			2.081	80.5001	64.9953		2.081	100.042	98.5752
	1218.8	30			1.041	52.3321	36.0435		1.041	99.9563	104.363
					0.5203	45.8817	16.3396		0.5203	98.8806	102.495
	PLpro + BCS071/7
	m/z	charge			[inhibitor], uM	remdesivir
	1058.36	35			10	100.539	97.0729
	1089.47	34			5	102.213	97.2738
	1122.44	33			2.5	103.312	104.939
	1157.5	32			1.25	67.1984	88.5098
	1194.8	31			0.625	23.6328	43.3366
	1234.59	30			0.313	16.4554	26.9427
					0.156	2.05837	6.07846

## Sheet: Figure 6
Figure 6
[Compound 7], uM	Percent Nsp3 inhibition
50	90.7	89.9					Uncropped scan of HEK293 HA-NSP3 pulldown data (with MW markers)
16.7	87.7	86.3
5.56	83.8	86.8
1.852	83.9	84
0.617	85.8	84.9
0.206	73	78.1
0.069	52.6	55.2
0.023	4.6	22.7
0.008	-14.4	7.7
0.003		-4
[GRL0617], uM	Percent Nsp3 inhibition
50	66.6	74.4	72.1
16.7	52.7	59.6	64.5
5.56	35.5	38.1	47.9
1.852	24.6	18.2	39
0.617	-4.6	8.6	18.6
0.206	9.5	4	-4.6
0.069	-3.2	-5.1	0.060949
0.023	-10.7	-14.2	-2.6
0.008	-7.8	0.2	-12.4

## Sheet: Table 2
Cytotoxicity Data for Compound 7 on Vero E6 cells (SARS2-735)
	Percent Cytotoxicity (Neutral Red)
Conc. (µM)	compound 7	EIDD-1931	EIDD-1931 Conc. (µg/mL)
10	0.385197	0.389271	100
1	0.0378289	0.230156	10
0.1	0	0	1
0.01	0	0	0.1
Cytopathic Effect Data for Compound 7 Against SARS-CoV-2 USA-WA1/2020 strain (SARS2-735)
	Percent Cytopathic Effect (Neutral Red)
Conc. (µM)	compound 7	EIDD-1931	EIDD-1931 Conc. (µg/mL)
10	0.135367	0	100
1	0.464444	0.00559004	10
0.1	0.418257	0	1
0.01	0.905263	0.958933	0.1
Cytotoxicity Data for Compound 7 on Vero E6 cells (SARS2-733)
	Percent Cytotoxicity (Neutral Red)
Conc. (µM)	compound 7	EIDD-1931	EIDD-1931 Conc. (µg/mL)
10	0.0931543	0.481809	100
1	0.0476555	0.367311	10
0.1	0.0714484	0.0511308	1
0.01	0.1182	0.0214137	0.1
Cytopathic Effect Data for Compound 7 Against SARS-CoV-2 Delta variant (SARS2-733)
	Percent Cytopathic Effect (Neutral Red)
Conc. (µM)	compound 7	EIDD-1931	EIDD-1931 Conc. (µg/mL)
10	0.498934	0	100
1	0.759899	0	10
0.1	0.99513	0.0232676	1
0.01	0.991537	0.963723	0.1
Cytotoxicity Data for Compound 7 on Vero E6 cells (SARS2-733)
	Percent Cytotoxicity (Neutral Red)
Conc. (µM)	compound 7	EIDD-1931	EIDD-1931 Conc. (µg/mL)
10	0.27427	0.45604	100
1	0.0328635	0.283824	10
0.1	0.0112901	0	1
0.01	0.0630663	0	0.1
Cytopathic Effect Data for Compound 7 Against SARS-CoV-2 Omicron variant (SARS2-733)
	Percent Cytopathic Effect (Neutral Red)
Conc. (µM)	compound 7	EIDD-1931	EIDD-1931 Conc. (µg/mL)
10	0.0851811	0	100
1	0.539205	0	10
0.1	0.710192	0	1
0.01	0.912999	0.948709	0.1

## Sheet: Table 3
Table 3. Cytotoxicity Data for Compound 7 on Caco-2 cells (SARS2-740)
	Percent Cytotoxicity (Neutral Red)
Conc. (µM)	compound 7	EIDD-1931	EIDD-1931 Conc. (µg/mL)
10	0.396305	0.518663	100
3.2	0.0167358	0.176141	32
1	0	0.138082	10
0.32	0.00830098	0.178092	3.2
0.1	0	0.134179	1
0.032	0	0.114174	0.32
0.01	0.0163342	0.155648	0.1
0.0032	0.131611	0.124421	0.032
Virus Yield Reduction Data for Compound 7 against SARS-CoV-2 USA-WA1/2020 strain
	Virus Titer - CCID50/mL (Log10)
Conc. (µM)	compound 7	EIDD-1931	EIDD-1931 Conc. (µg/mL)
10	<0.7	<0.7	100
3.2	<0.7	<0.7	32
1	<0.7	<0.7	10
0.32	<0.7	<0.7	3.2
0.1	1.7	<0.7	1
0.032	3.3	2	0.32
0.01	4	3.7	0.1	Virus Control
0.0032	4.3	4	0.032	4.2
EC90	0.26	0.12
Cytotoxicity Data for Progenra Compounds on Caco-2 cells (SARS2-740)
	Percent Cytotoxicity (Neutral Red)
Conc. (µM)	compound 7	EIDD-1931	EIDD-1931 Conc. (µg/mL)
10	0.0441532	0.300228	100
3.2	0.0400138	0.15215	32
1	0.0800276	0.0529532	10
0.32	0	0.081706	3.2
0.1	0	0.147119	1
0.032	0	0.0400144	0.32
0.01	0	0.0788307	0.1
0.0032	0	0.0033545	0.032
Virus Yield Reduction Data for Compound 7 against SARS-CoV-2 Delta variant (SARS2-740)
	Virus Titer - CCID50/mL (Log10)
Conc. (µM)	compound 7	EIDD-1931	EIDD-1931 Conc. (µg/mL)
10	4	<0.7	100
3.2	4	1.7	32
1	4.5	3	10
0.32	4.7	4.5	3.2
0.1	4.7	4.7	1
0.032	4.7	4.7	0.32
0.01	5	5	0.1	Virus Control
0.0032	4.5	5	0.032	4.6
Cytotoxicity Data for Compound 7 on Caco-2 cells (SARS2-740)
	Percent Cytotoxicity (Neutral Red)
Conc. (µM)	compound 7	EIDD-1931	EIDD-1931 Conc. (µg/mL)
10	0.18131	0.246368	100
3.2	0.0325847	0.0614149	32
1	0.00325847	0.0118106	10
0.32	0.0102409	0	3.2
0.1	0.0339811	0.0465336	1
0.032	0.123356	0.0118106	0.32
0.01	0.0835564	0.00118106	0.1
0.0032	0.166647	0.0401559	0.032
Virus Yield Reduction Data for Progenra Compounds against SARS-CoV-2 Omicron variant (SARS2-740)
	Virus Titer - CCID50/mL (Log10)
Conc. (µM)	compound 7	EIDD-1931	EIDD-1931 Conc. (µg/mL)
10	2.5	<0.7	100
3.2	2.5	<0.7	32
1	3	<0.7	10
0.32	4	2.5	3.2
0.1	4.3	3.5	1
0.032	4.3	4	0.32
0.01	4	4	0.1	Virus Control
0.0032	4.3	4	0.032	3.6

## Sheet: Figure S4
																Supplementary Figure 4
																	v_0, uM AMC released/s
																[Substrate, uM]	Z-RLRGG-AMC		Z-LRGG-AMC
																500	0.022345	0.020366	0.0134015	0.00917369
																400	0.022425	0.0213677	0.0122954	0.008619
																300	0.022234	0.0217318	0.0112787	0.008327
																200	0.019878	0.0202495	0.0085069	0.00580206
																150	0.0189813	0.0188826	0.00738687	0.004499
																100	0.0140451	0.0158085	0.00493077	0.003514
																80	0.013363	0.0150174	0.0045778	0.00284483
																60	0.010293	0.0129628	0.00333046	0.002284
																40	0.00799	0.00860877	0.00244784	0.001148
																20	0.004088	0.0054539	0.0013273	0.00070789
																10	0.002321	0.00281512	0.00061746	0.000327
																0	0.000127	-5.653e-06	-1.615e-05	-2e-06

## Sheet: Figure S5
GRL0617
Concentration of inhibitor (uM)	% Plpro activity
200	41.6207	41.5663
63.3	54.6039	57.1891
20	68.9813	71.0226
6.34	77.8019	79.4738
2.01	86.5337	87.6044
0.63	93.6623	85.4372
0.2	96.9661	98.3689
0.06	100.152	97.7018
0.02	98.0339	100.817
0	95.4573	99.577
compound 3
Concentration of inhibitor (uM)	% Plpro activity
100	78.5591	75.0822
31.3	104.338	98.1519
19.5	102.208	101.519
6.1	102.13	109.068
1.91	90.7596	97.7447
1.19	110.337	110.384
0.37	119.311	113.093
0.12	108.081	110.666
0	92.733	102.365
compound 5
Concentration of inhibitor (uM)	% Plpro activity
100	13.8919	12.4354
31.3	47.5959	46.343
19.5	46.3587	56.0063
6.1	86.5466	84.0251
1.91	88.9898	92.1065
1.19	100.141	100.36
0.37	102.96	104.886
0.12	108.645	107.58
0	92.733	102.365
compound 7
Concentration of inhibitor (uM)	% Plpro activity
200	4.34741	2.67582
63.3	4.29974	1.06143
20	2.84743	1.7574
6.34	-0.572028	4.26161
2.01	-0.101694	1.95761
0.63	0.448088	1.84956
0.2	17.4055	17.3769
0.06	66.6095	84.4377
0.02	68.3065	93.4376
0	96.9619	88.2035
compound 8
Concentration of inhibitor (uM)	% Plpro activity
200	1.15932	-2.44086
63.3	1.77697	-2.3814
20	3.46146	0.0389744
6.34	-1.65146	1.17914
2.01	-0.908303	4.92796
0.63	-0.39635	2.33516
0.2	57.7912	70.9005
0.06	89.5454	102.348
0.02	68.8163	99.005
0	90.249	92.0953
compound 9
Concentration of inhibitor (uM)	% Plpro activity
200	-2.03388	1.39829
63.3	6.54654	-0.540249
20	17.7519	16.3441
6.34	38.1225	52.1149
2.01	58.2896	91.4545
0.63	108.863	91.4704
0.2	78.3106	110.738
0.06	74.1094	127.267
0.02	82.9758	127.731
0	96.9619	88.2035
compound 10
Concentration of inhibitor (uM)	% Plpro activity
200	1.02721	-0.650675
63.3	-3.18071	-2.97923
20	1.4764	5.73717
6.34	37.2305	35.5196
2.01	80.3534	69.718
0.63	89.7403	127.119
0.2	98.0405	140.344
0.06	101.912	95.9894
0.02	90.3216	108.59
0	90.249	92.0953
compound 11
Concentration of inhibitor (uM)	% Plpro activity
200	5.82649	3.13872
63.3	26.2894	17.2824
20	41.3827	29.3982
6.34	46.4268	59.1548
2.01	71.2677	77.1062
0.63	74.8902	108.78
0.2	89.9328	82.7206
0.06	109.004	62.8849
0.02	84.3841	89.6252
0	83.1746	133.469
compound 12
Concentration of inhibitor (uM)	% Plpro activity
200	2.38663	3.08577
63.3	1.71608	6.84527
20	0.708679	4.1472
6.34	3.71183	-0.244701
2.01	-3.36861	5.94909
0.63	4.18216	3.9025
0.2	14.7933	20.0528
0.06	75.9272	69.8637
0.02	126.987	106.826
0	96.9619	88.2035
compound 13
Concentration of inhibitor (uM)	% Plpro activity
200	41.0184	66.5731
63.3	73.854	65.1187
20	90.5361	82.4429
6.34	108.995	94.8992
2.01	73.6001	100.084
0.63	113.251	76.0938
0.2	107.314	100.012
0.06	101.338	93.7136
0.02	92.3399	130.019
0	83.1746	133.469
compound 14
Concentration of inhibitor (uM)	% Plpro activity
200	40.7526	33.8181
63.3	77.575	58.0797
20	56.1744	69.3475
6.34	77.3899	72.5071
2.01	90.4704	79.8119
0.63	92.095	104.342
0.2	103.001	104.187
0.06	94.2482	90.2494
0.02	96.267	116.085
0	83.1746	133.469
compound 15
Concentration of inhibitor (uM)	% Plpro activity
200	0.140982	-0.935387
63.3	6.3165	7.96301
20	26.7212	23.5429
6.34	56.8939	47.4481
2.01	61.7792	76.7133
0.63	93.6236	91.403
0.2	109.516	97.7423
0.06	103.679	85.2186
0.02	114.704	106.913
0	90.249	92.0953

## Sheet: Figure S6
Supplementary Figure 6
I-a
compound 7
preincubation time, min	0.3		0.25		0.2		0.17		0.14		0.1
90	-5.36465	-2.42846	-0.217222	0.80013	0.513707	1.002	2.20468	2.58192	10.6825	15.4771	59.6376	61.2047
60	-5.07884	-1.71799	-1.94037	-0.830513	2.60471	4.11112	0.484829	21.4889	28.3982	46.0531	74.1276	84.2882
45	-2.54749	-0.00321225	3.59205	5.4805	9.4971	27.7208	23.2875	42.7901	52.1424	72.7653	75.31	95.1017
30	17.7105	24.8803	14.2923	5.93225	3.25539	51.6211	41.883	45.7929	67.0661	71.2325	78.2862	118.837
15	26.72	23.0554	18.7942	32.3285	59.3675	65.7454	44.1038	68.0482	71.5809	88.3718	103.968	101.798
10	30.6649	23.9583	6.577	44.7601	32.5538	81.2118	63.7785	78.6519	73.5317	87.898	57.1553	107.701
5	50.62	93.5849	49.0618	101.569	104.624	105.262	57.0378	91.0385	72.7792	111.74	95.7465	112.5
0	90.6739	109.326	89.111	110.889		100	85.7835	114.216	78.9939	121.006	89.1369	110.863
I-b
compound 8
preincubation time, min	0.2		0.17		0.14		0.1
90	-0.346835	7.0358	5.23439	4.09923	14.6673	16.1442	44.6154	44.727
60	12.6099	10.1325	9.88018	28.6525	40.335	46.9745	64.4169	66.2407
45	0.445931	41.6698	17.3849	65.4614	57.4015	72.3102	72.4814	79.4665
30	-0.297287	32.2309	16.481	55.6023	35.3403	56.3	66.2159	81.6129
15	7.85334	84.7021	29.6616	73.7229	70.2731	66.5158	66.3275	60.8685
10	19.621	39.564	48.8753	63.2962	59.9366	74.2417	71.5385	78.3995
5	56.9305	93.695	68.8669	113.349	76.0223	73.6381	79.4541	92.7916
0	72.3647	127.635	75.6779	124.322	91.7459	108.254	99.8015	100.199
I-c
compound 9
preincubation time, min	36		30		25		15		12.5		10		8		5		4		2		1
110									1.66066	-1.35607			2.25528	1.04557					17.955	17.1275
90	-3.96318	7.99717	-0.42009	2.17045	10.7215	8.79557	12.6161	20.3749			2.12056	-1.21359			9.22861	8.47392	18.4606	27.727			54.0315	52.9992
85									0.706662	-1.71708			0.564706	-0.08598					29.759	23.9973
60	0.035371	0.618998	-1.36691	4.70902	12.5281	17.2339	7.87296	14.4412	5.90341	4.43585	13.4627	5.12271	10.2535	5.63423	16.0551	9.87115	21.8265	35.492	42.285	40.8193	68.0541	66.7334
45	6.33506	11.7098	6.98493	5.24895	9.03171	-8.06264	10.8261	10.5143	13.633	9.92641	14.0662	16.8895	12.2633	8.54681	20.2741	17.3865	30.5974	44.2161	56.0735	53.1106	79.8683	72.0896
30	12.4767	24.1313	13.7033	19.8818	10.2876	5.6361	12.2263	14.9122	18.2255	12.4668	31.5792	17.9719	30.8693	20.3763	40.6042	38.1758	44.7698	46.1636	68.5407	61.3509	83.9248	64.1102
20									23.1237	14.7197			39.6272	35.0665					77.2242	76.067
15	17.9583	22.4169	29.9138	30.0713	17.7699	31.0923	40.1631	34.2299			49.6676	33.4439			57.3592	47.7231	73.3497	83.4694			93.2813	79.1955
10	38.639	34.3972	42.9006	36.5308	38.065	41.5924	47.4033	48.0333	43.311	40.6784	53.3869	39.3206	74.553	34.281	73.9947	69.3808	59.2144	83.988	93.1878	77.1093	103.404	84.8959
5	57.3264	60.3661	61.9827	70.4712	57.8339	72.9669	66.847	74.5417			78.5116	73.0846			92.8505	86.9367	97.602	105.57			102.578	96.3865
0	90.1278	109.872	98.7937	101.206	96.3563	103.644	102.17	97.8297	108.86	91.1404	99.4513	100.549	110.018	89.9818	104.721	95.2789	100.282	99.7184	102.709	97.2915	104.693	95.3068
i-d
compound 10
preincubation time, min	36		30		25		15		10		4
90	-25.0585	-2.45902	-16.7005	-11.862	-5.24265	4.04849	-6.24055	-4.60841	-7.88086	-8.6913	2.84827	-7.20752
60	-9.01639	-9.13349	-9.36476	-12.5644	1.15775	-3.78636	-2.01618	-10.1289	-1.5091	-4.10811	8.34075	-4.34188
45	0.809719	11.37	-1.87295	5.75933	6.18925	-2.62133	0.542448	-0.624055	12.0672	4.75255	18.7917	20.6066
30	-16.9438	-2.69321	-18.4174	-5.54081	-1.38348	-3.64073	6.33176	4.44999	3.30884	12.511	29.7896	30.0588
15	-15.1054	-0.936768	7.69471	6.15733	2.83249	7.62369	15.467	7.82949	23.732	22.5309	43.3884	47.7259
10	15.8899	8.85246	10.4495	12.4707	12.6406	21.7425	21.2083	18.8849	33.1667	37.6325	73.0217	58.4243
5	25.1054	43.3021	23.0841	28.4376	27.9754	30.6186	31.5964	44.6775	61.4931	56.6706	76.6689	67.1732
0	97.0726	102.927	80.6228	119.377	86.2854	113.715	96.4597	103.54	88.8916	111.108	88.3572	111.643
I-e
compound 12
preincubation time, min	0.7		0.6		0.55		0.5		0.3		0.2
90	-1.32924	3.97312	-10.6375	-1.16469	1.90165	-25.5683	3.96014	-4.27074	21.1946	15.6452	60.0225	55.2619
60	-0.876425	4.92259	2.7176	4.81404	3.19418	-1.79765	2.69186	0.142358	47.1309	16.4007	83.4786	65.7764
45	1.72364	-9.61145	15.7155	-1.42869	5.70495	0.386273	1.63064	2.04478	39.5232	62.6067	75.2507	69.0657
30	7.88782	4.3383	-7.20553	10.9481	4.27871	18.7194	14.4299	17.51	73.1453	71.0089	87.452	72.7861
15	17.7914	22.9477	27.5021	22.9987	31.0949	35.5965	34.593	39.6532	103.771	55.7676	81.9979	75.2975
10	29.5355	34.648	41.82	39.0248	44.555	34.4525	40.2226	32.82	78.851	46.8052	69.7592	71.8864
5	46.2898	38.1098	59.0418	56.1845	64.8046	53.3502	68.1248	73.0296	93.936	69.12	79.9831	79.702
0	81.2153	118.785	94.557	105.443	107.607	92.3934	113.822	86.1783	91.2786	108.721	106.222	93.7775
II-a
[compound 7], uM	mean
0.3	0.09135
0.25	0.09376
0.2	0.03867
0.17	0.03194
0.14	0.01526
0.1	0.004243
II-b
[compound 8], uM	mean
0.2	0.06515
0.17	0.03178
0.14	0.01796
0.1	0.00907
II-c
[compound 9], uM	mean
36	0.09676
30	0.08019
25	0.08961
15	0.0658
12.5	0.077
10	0.05582
8	0.05027
5	0.03435
4	0.02101
2	0.01466
1	0.007039
II-e
[compound 10], uM	mean
36	0.2282
30	0.2502
25	0.2178
15	0.1715
10	0.0999
4	0.04571
II-d
[compound 12], uM	mean
0.7	0.1287
0.6	0.09645
0.55	0.08556
0.5	0.07601
0.3	0.01726
0.2	0.006876

## Sheet: Figure S7
Supplementary Figure 7
7a
preincubation time, min	36		30		25		15		10		4
90	85.7995	95.208	98.7636	101.147	108.077	91.923	83.6762	83.4233	106.228	93.7718	101.698	98.302
60	139.582	78.0411	80.5601	92.805	124.525	109.307	82.6981	76.4418	91.9793	93.5744	101.017	101.502
45	106.056	127.541	91.3749	80.292	121.129	82.9634	86.425	97.9089	93.1946	98.5265	94.5593	107.97
30	81.1304	126.523	79.7855	82.6754	82.4017	92.8858	86.0371	74.1484	100.061	90.7489	88.7836	98.764
15	81.1304	71.2656	70.4305	66.3191	79.5132	85.2099	66.0708	79.7639	101.656	90.9464	83.5855	90.9437
10	77.7953	77.4794	75.4655	102.666	89.8904	91.5218	77.3356	77.7403	80.0547	87.255	83.6779	101.455
5	92.575	85.2378	95.8141	79.5769	90.0241	87.1089	76.4418	84.9073	86.0702	86.6626	91.8448	107.185
0	85.4134	114.587	141.397	58.6027	84.5146	89.7031	87.2007	112.799	92.6933	102.309	86.8199	97.0891
7b
preincubation time, min	36		30		25		15		10		4		1		0
60	83.3869	58.8297	87.0823	102.92	94.4001	103.604	101.101	98.8991	96.7977	103.202	96.5862	103.414	94.1091	97.2817	91.1239	108.876
30	72.7544	77.0971	94.2598	135.407	100.409	108.264	76.1305	90.5217	77.1141	79.5412	89.7263	87.1764	117.215	80.2904	108.352	97.1679
0	104.579	95.421	101.967	98.0327	99.6981	100.302	99.9882	96.6538	90.6077	101.382	87.2151	94.4489	105.275	94.7251	94.3122	101.122

## Sheet: Figure S8
Supplementary Figure 8
a	PLpro wild type				b	PLpro + compound 7
	m/z	charge			m/z	charge
	1044.83	35			1058.36	35
	1075.51	34			1089.47	34
	1108.1	33			1122.44	33
	1142.68	32			1157.5	32
	1179.52	31			1194.8	31
	1218.8	30			1234.59	30
c	PLpro + compound 8				d	PLpro + compound 9
	m/z	charge			m/z	charge
	1060.01	35			1056.29	35
	1091.16	34			1087.33	34
	1124.19	33			1120.25	33
	1159.3	32			1155.24	32
	1196.67	31			1192.46	31
	1236.52	30			1232.18	30
e	PLpro + compound 10				e	PLpro + compound 12
	m/z	charge			m/z	charge
	1057.97	35			1056.66	35
	1089.05	34			1087.7	34
	1122.03	33			1120.63	33
	1157.06	32			1155.63	32
	1194.36	31			1192.88	31
	1234.12	30			1232.61	30

## Sheet: Figure S9
Supplementary Figure 9
	cytopathic effect				cytotoxicity
	% cell viability				%cell viability
[inhibitor], uM	GRL0617			[inhibitor], uM	GRL0617
33.3	6.73182	6.41198		33.3	77.7953	75.9344
16.65	-1.12004	8.1974		16.65	80.2809	87.8714
8.325	7.10531	3.61653		8.325	93.2721	100.005
4.163	8.43728	7.6482		4.163	100.13	100.198
2.081	15.1497	8.21844		2.081	99.0573	100.642
1.041	11.5294	14.4048		1.041	103.765	103.547
0.5203	21.8727	1.91949		0.5203	101.603	99.3493
[inhibitor], uM	compound 3			[inhibitor], uM	compound 3
33.3	-0.712876	0.148798		33.3	82.833	83.4193
16.65	1.21774	-0.078457		16.65	92.0064	90.6446
8.325	1.24299	-0.114229		8.325	93.1686	97.3554
4.163	3.40717	-0.401453		4.163	98.953	99.4173
2.081	7.80602	8.63402		2.081	104.896	99.6147
1.041	12.1849	3.77645		1.041	101.07	106.534
0.5203	12.4332	4.67916		0.5203	104.43	102.194
[inhibitor], uM	compound 5			[inhibitor], uM	compound 5
33.3	4.24569	-1.08532		33.3	88.2743	87.2297
16.65	2.94634	2.5981		16.65	94.7692	89.1586
8.325	8.23738	8.30892		8.325	96.951	100.787
4.163	13.8546	6.6224		4.163	100.676	102.139
2.081	11.2106	7.11794		2.081	101.439	100.123
1.041	11.2275	15.9661		1.041	101.949	110.735
0.5203	10.3521	2.61388		0.5203	101.446	100.992
[inhibitor], uM	compound 7			[inhibitor], uM	compound 7
33.3	79.7616	87.0127		33.3	84.8824	79.2702
16.65	88.8254	97.0077		16.65	95.686	90.3895
8.325	95.2833	73.4931		8.325	99.6095	99.5452
4.163	79.3228	69.2595		4.163	97.1417	99.5474
2.081	80.5001	64.9953		2.081	100.042	98.5752
1.041	52.3321	36.0435		1.041	99.9563	104.363
0.5203	45.8817	16.3396		0.5203	98.8806	102.495
[inhibitor], uM	compound 8			[inhibitor], uM	compound 8
0.520833	1.47	-1.85		0.520833	88.96	86.95
1.04167	1.93	0.63		1.04167	87.32	81.85
2.08333	1.22	0.9		2.08333	83.68	78.83
4.16667	1.32	-0.67		4.16667	81.54	80.53
8.33333	4.63	2.82		8.33333	87.15	82.62
16.6667	6.85	2.79		16.6667	82.63	76.26
33.3333	17.74	6.02		33.3333	75.59	75.37
[inhibitor], uM	compound 9			[inhibitor], uM	compound 9
33.3	75.3743	47.1158		33.3	83.6521	86.4438
16.65	19.7874	20.9689		16.65	91.395	94.0425
8.325	26.9375	17.8862		8.325	99.0928	103.333
4.163	17.3518	10.2932		4.163	98.1146	101.227
2.081	10.7161	12.0323		2.081	101.948	100.62
1.041	13.2496	16.3912		1.041	98.4355	102.513
0.5203	16.2165	2.86533		0.5203	103.687	103.902
[inhibitor], uM	compound 10			[inhibitor], uM	compound 10
0.520833	2.13	-0.06		0.520833	87.49	85.98
1.04167	1.74	-1.05		1.04167	89.63	86.92
2.08333	2.2	1.32		2.08333	92.22	80.2
4.16667	9.53	1.64		4.16667	90.46	79.12
8.33333	30.98	2.56		8.33333	84.43	79.78
16.6667	24.64	3.57		16.6667	81.5	73.17
33.3333	5.62	-20.85		33.3333	73.36	66.03
[inhibitor], uM	compound 11			[inhibitor], uM	compound 11
0.520833	0.2	-1		0.520833	100.6	99.3
1.04167	9.7	6.1		1.04167	99.8	98.6
2.08333	8	4.7		2.08333	100.6	98.9
4.16667	4.6	1.3		4.16667	95.9	94.4
8.33333	7.6	1.2		8.33333	94	91.2
16.6667	5.3	2.1		16.6667	88.6	87.9
33.3333	3.6	1.4		33.3333	80.8	80.5
[inhibitor], uM	compound 12			[inhibitor], uM	compound 12
0.520833	3.49	-1.32		0.520833	89.33	79.53
1.04167	6.23	4.31		1.04167	67.76	57.64
2.08333	16.62	-2.52		2.08333	55.22	4.07
4.16667	-25.39	-25.55		4.16667	6.94	1.37
8.33333	-26.12	-26.33		8.33333	0.83	0.83
16.6667	-26.27	-26.31		16.6667	0.57	0.55
33.3333	-26.25	-26.41		33.3333	1.02	0.51
[inhibitor], uM	compound 13			[inhibitor], uM	compound 13
0.520833	0.95	-0.4		0.520833	87.65	83.24
1.04167	6.74	1.37		1.04167	80.63	79.34
2.08333	12.59	5.94		2.08333	83.49	72.9
4.16667	9.65	3.76		4.16667	85.09	60.96
8.33333	11.92	-26.03		8.33333	37.86	2.45
16.6667	-26.33	-26.69		16.6667	0.88	0.71
33.3333	-26.6	-26.99		33.3333	1.15	0.54
[inhibitor], uM	compound 14			[inhibitor], uM	compound 14
33.3	3.05787	3.29459		33.3	88.4296	82.9025
16.65	7.04955	5.25466		16.65	95.7193	92.3775
8.325	14.1818	4.79174		8.325	95.1581	99.1024
4.163	10.7445	8.39414		4.163	101.675	106.368
2.081	11.2811	7.39254		2.081	100.148	96.5517
1.041	7.91754	8.12691		1.041	100.856	111.195
0.5203	17.679	2.01628		0.5203	104.577	104.87
[inhibitor], uM	compound 15			[inhibitor], uM	compound 15
0.520833	2.46	-0.46		0.520833	88.08	82.38
1.04167	2.87	0.19		1.04167	82.64	81.82
2.08333	1.69	0.64		2.08333	85.53	75.89
4.16667	3.85	1.71		4.16667	87.92	83.42
8.33333	5.51	3.31		8.33333	85.85	83.23
16.6667	8.63	6.9		16.6667	81.35	80.07
33.3333	14	6.96		33.3333	64.86	59.25
[inhibitor], uM	remdesivir
10	100.539	97.0729
5	102.213	97.2738
2.5	103.312	104.939
1.25	67.1984	88.5098
0.625	23.6328	43.3366
0.313	16.4554	26.9427
0.156	2.05837	6.07846
